# Supplementary material
Source: Springer Nature journal article supplement (https://www.springermedizin.de/resource/supplementary/13051_2010_118_MOESM5_ESM.pdf/9669978)

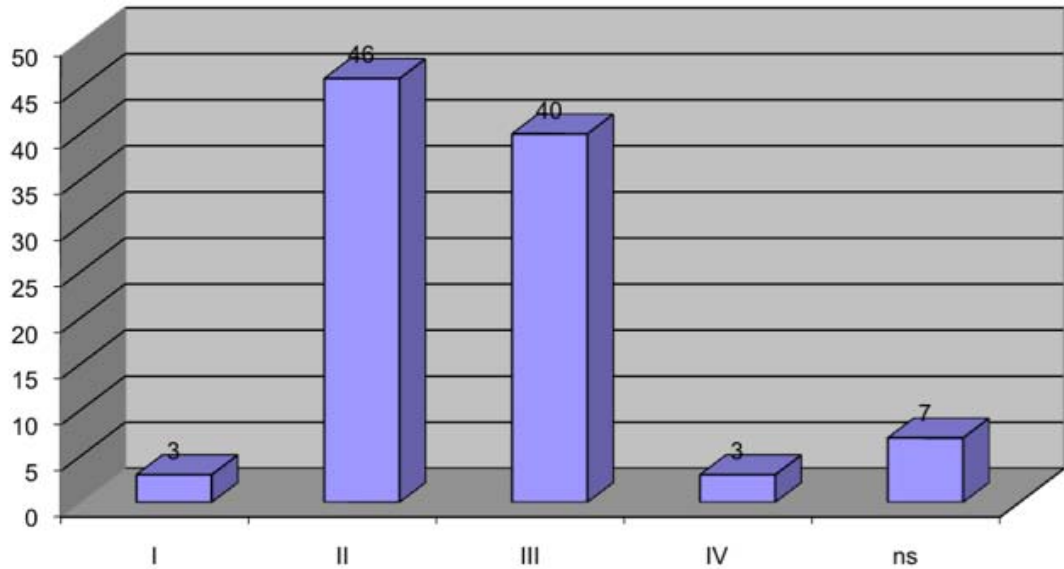

Supplement: MOESM5 [file 9669978]
